# Supplementary material
Source: publisher site journal article supplement (http://kjim.org/upload/media/kjim-2022-215-Supplementary-Table-4.pdf)
Supplement: Supplementary file 1 [file kjim-2022-215-Supplementary-Table-4.pdf]

**Supplementary Table 4. Comorbidity by disease code and health conditions**

| Comorbidity by KCD-7 code                           | Total         | Age group of total CHC patients |                 |              |              |              | Gender       |              | Cirrhosis status |                   | DAA exposure   |              | p value      |          |
|-----------------------------------------------------|---------------|---------------------------------|-----------------|--------------|--------------|--------------|--------------|--------------|------------------|-------------------|----------------|--------------|--------------|----------|
|                                                     |               | 18-34 years                     | 35-44 years     | 45-54 years  | 55-64 years  | 65-74 years  | ≥ 75 years   | Male         | Female           | without cirrhosis | with cirrhosis | Unexposed    |              | Exposed  |
| Hypertension                                        | 16,769 (34.1) | 26 (2.1)                        | 305 (9.5)       | 2,181 (20.1) | 4,779 (31.3) | 5,286 (46.6) | 4,192 (57.2) | 7,796 (34.1) | 8,973 (34.0)     | 15,776 (33.8)     | 993 (38.0)     | 8,931 (33.7) | 7,838 (34.4) | < 0.0001 |
| Dyslipidemia                                        | 10,583 (21.5) | 100 (8.2)                       | 464 (14.4)      | 2,023 (18.6) | 3,599 (23.6) | 2,865 (25.3) | 1,532 (20.9) | 4,508 (19.7) | 6,075 (23.0)     | 10,231 (21.9)     | 352 (13.5)     | 5,777 (21.8) | 4,806 (21.1) | < 0.0001 |
| Diabetes mellitus                                   | 9,777 (19.9)  | 29 (2.4)                        | 237 (7.3)       | 1,711 (15.8) | 2,961 (19.4) | 2,843 (25.1) | 1,996 (27.3) | 5,466 (23.9) | 4,311 (16.4)     | 9,021 (19.4)      | 756 (28.9)     | 5,047 (19.1) | 4,730 (20.8) | 0.0013   |
| Peptic ulcer or gastrointestinal ulcer              | 3,872 (7.9)   | 21 (1.7)                        | 149 (4.6)       | 699 (6.4)    | 1,156 (7.6)  | 1,097 (9.7)  | 750 (10.2)   | 1,727 (7.6)  | 2,145 (8.1)      | 3,640 (7.8)       | 232 (8.9)      | 2,065 (7.8)  | 1,807 (7.9)  | < 0.0001 |
| Ischemic heart diseases                             | 3,052 (6.2)   | - <sup>a)</sup>                 | - <sup>a)</sup> | 294 (2.7)    | 772 (5.1)    | 1,109 (9.8)  | 847 (11.6)   | 1,695 (7.4)  | 1,357 (5.1)      | 2,896 (6.2)       | 156 (6.0)      | 1,746 (6.6)  | 1,306 (5.7)  | < 0.0001 |
| Cerebrovascular diseases                            | 2,824 (5.7)   | 9 (0.7)                         | 33 (1.0)        | 255 (2.3)    | 705 (4.6)    | 943 (8.3)    | 879 (12.0)   | 1,317 (5.8)  | 1,507 (5.7)      | 2,670 (5.7)       | 154 (5.9)      | 1,614 (6.1)  | 1,210 (5.3)  | < 0.0001 |
| Chronic renal disease                               | 1,437 (2.9)   | 7 (0.6)                         | 62 (1.9)        | 265 (2.4)    | 416 (2.7)    | 362 (3.2)    | 325 (4.4)    | 936 (4.1)    | 501 (1.9)        | 1,329 (2.9)       | 108 (4.1)      | 770 (2.9)    | 667 (2.9)    | 0.0066   |
| Alcoholic liver disease                             | 1,179 (2.4)   | 9 (0.7)                         | 77 (2.4)        | 420 (3.9)    | 450 (2.9)    | 156 (1.4)    | 67 (0.9)     | 940 (4.1)    | 239 (0.9)        | 1,016 (2.2)       | 163 (6.2)      | 629 (2.4)    | 550 (2.4)    | 0.0214   |
| Chronic hepatitis B                                 | 861 (1.7)     | 15 (1.2)                        | 81 (2.5)        | 233 (2.1)    | 289 (1.9)    | 158 (1.4)    | 85 (1.2)     | 463 (2.0)    | 398 (1.5)        | 78 (1.7)          | 73 (2.8)       | 427 (1.6)    | 434 (1.4)    | 0.8114   |
| Schizophrenia, schizotypal and delusional disorders | 613 (1.2)     | 12 (1.0)                        | 63 (1.9)        | 217 (2.0)    | 201 (1.3)    | 73 (0.6)     | 47 (0.6)     | 409 (1.8)    | 204 (0.8)        | 559 (1.2)         | 54 (2.1)       | 300 (1.1)    | 313 (1.4)    | 0.5995   |

Values are presented as number (%).

The mean number of comorbidities by disease code was counted if patients having at least one comorbidity using diagnostic KCD-7 disease code. KCD, Korean version of the International Classification of Disease; CHC, chronic hepatitis C; DAA, direct-acting antiviral.

<sup>a)</sup>As per Health Insurance Review & Assessment Service, counts/values ≤ 3 are masked.
